# Supplementary material for: A comparative performance evaluation of imputation methods in spatially resolved transcriptomics data
Source: Royal Society of Chemistry journal article supplement (doi:10.1039/d2mo00266c), 2022-12-15
Supplement: d2mo00266c1.pdf [file d2mo00266c1.pdf]

## 1 Supplementary Material

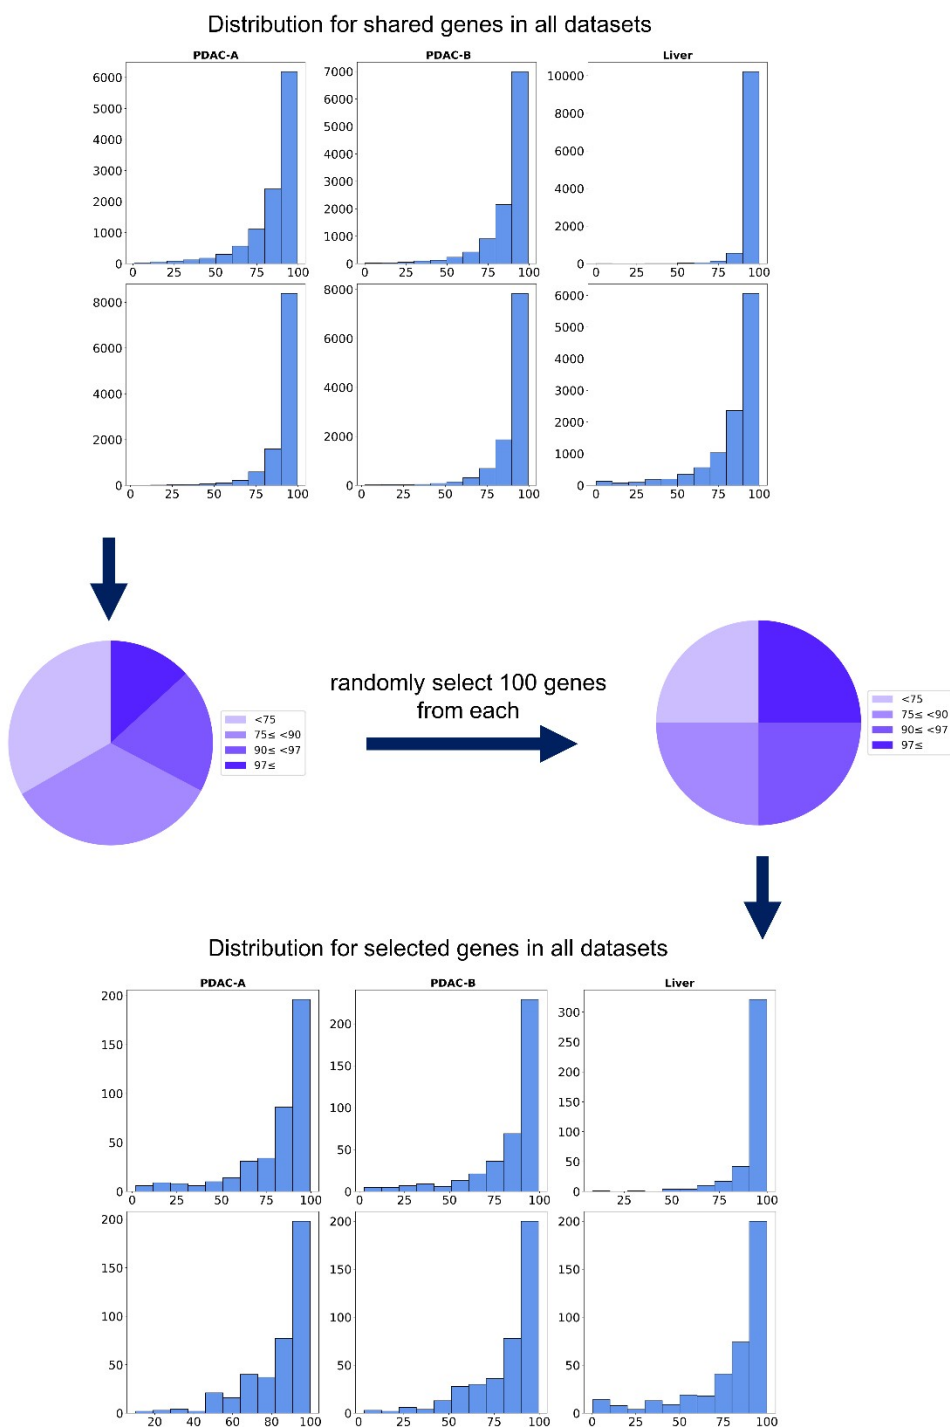

2

3 **Supplementary Figure 1:** The steps of selection of genes for the imputation. In each distribution

4 plot, the upper row refers the scRNA-seq and the lower rows indicates the SRT datasets.

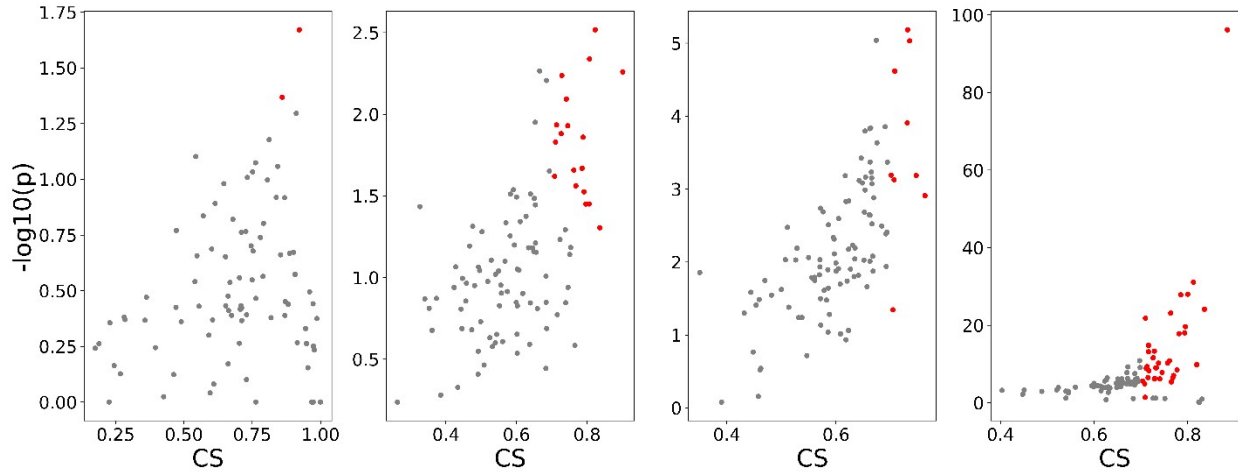

5

6 **Supplementary Figure 2:** Calculated CS of originally non-zero counts and the corresponding  
 7 predicted values for Liver dataset by gimVI. The columns represent the genes with very-high  
 8 sparsity, high sparsity, moderate sparsity, and low sparsity from left to right, respectively. The  
 9 statistically significant high similarities ( $p < 0.05$  and  $CS \geq 0.7$ ) indicated as red.

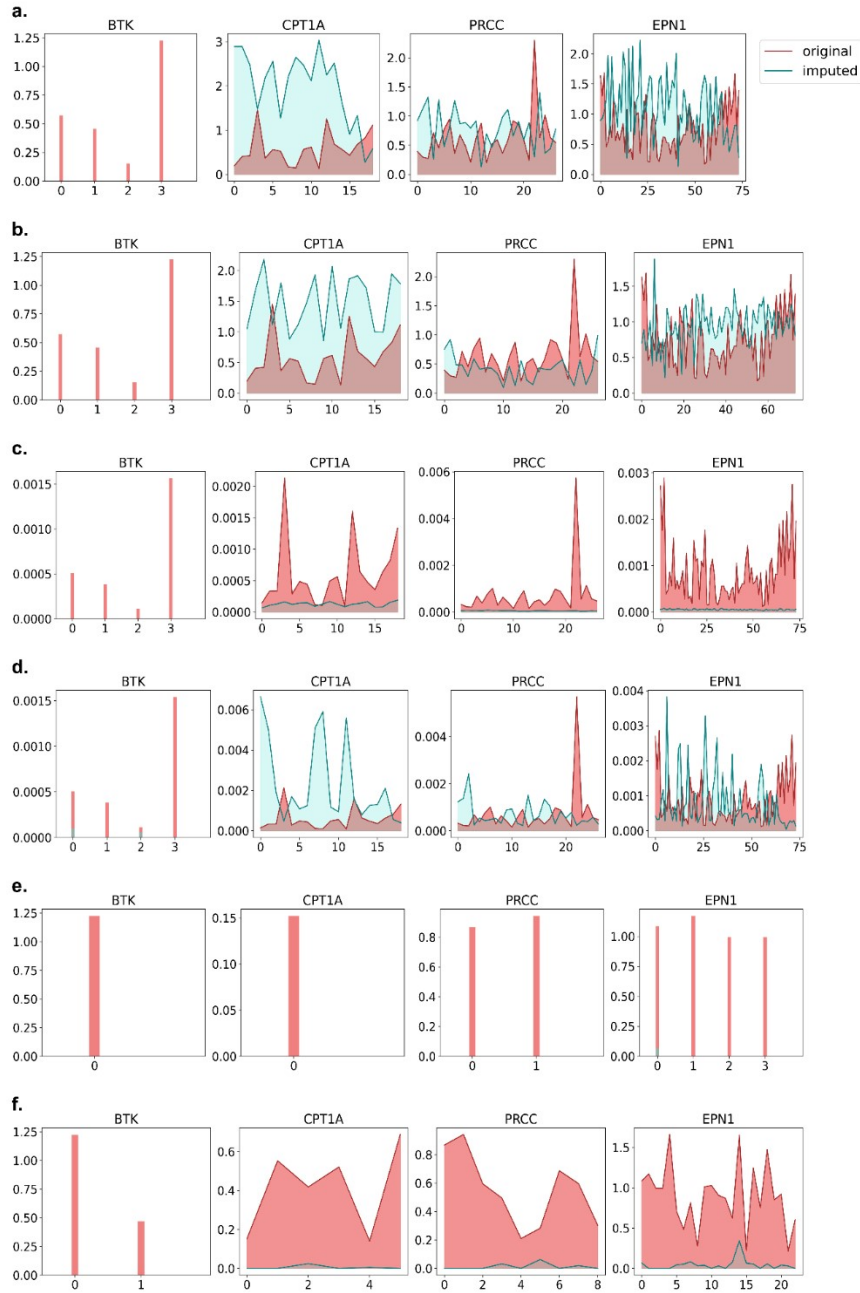

10

11 **Supplementary Figure 3:** Visualization of the original non-zero counts and their predicted values  
 12 for PDAC-B sample with **a.** SpaGE, **b.** stPlus, **c.** gimVI, **d.** Tangram, **e.** 5stLearn and **f.** 30stLearn.  
 13 The rows indicate the different groups of genes with very-high sparsity, high sparsity, moderate  
 14 sparsity and low sparsity, respectively. (The colors represent the original and the imputed values  
 15 for red and turquoise, respectively.)

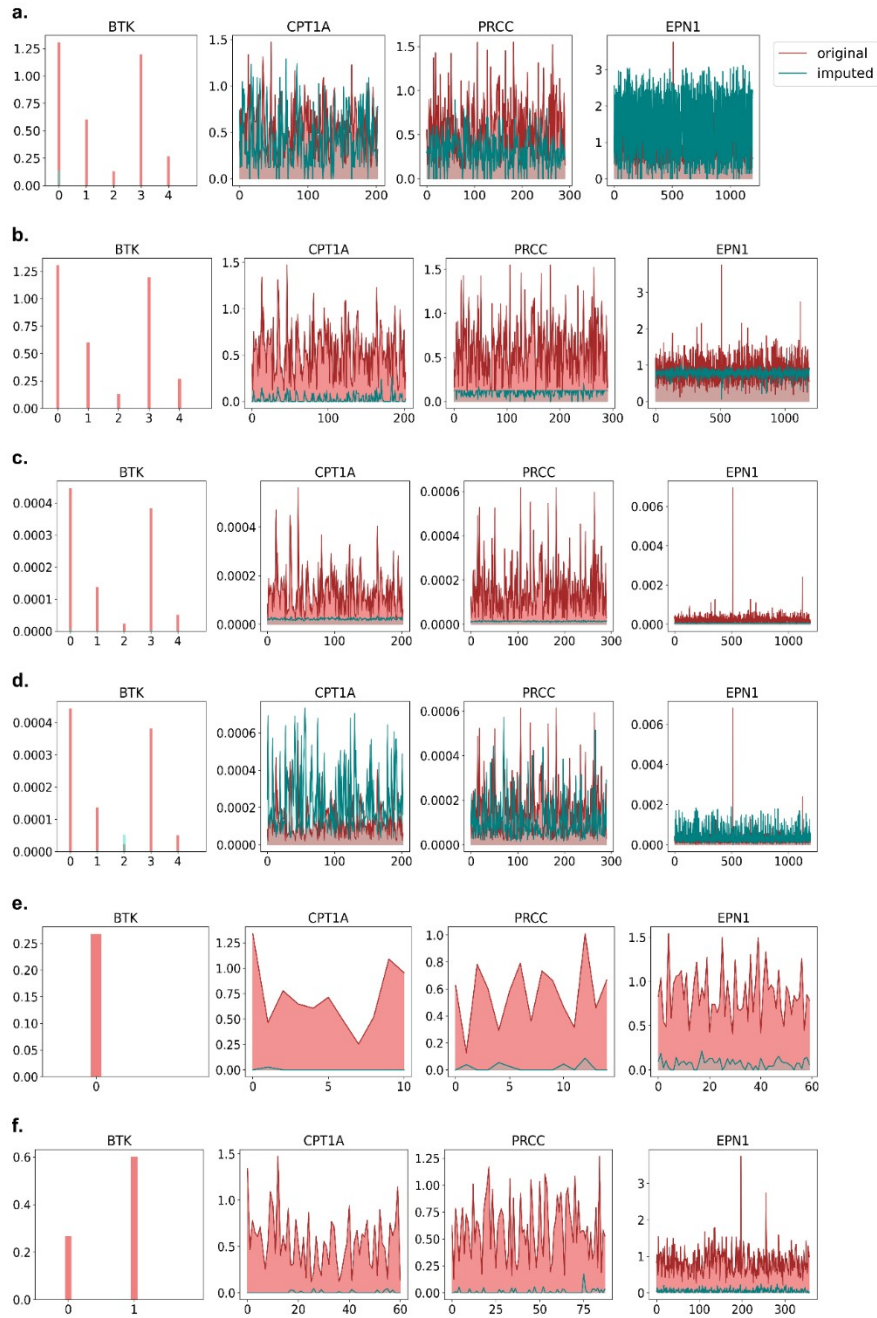

16

17 **Supplementary Figure 4:** Visualization of the original non-zero counts and their predicted values  
 18 for Liver sample with **a.** SpaGE, **b.** stPlus, **c.** gimVI, **d.** Tangram, **e.** 5stLearn and **f.** 30stLearn.  
 19 The rows indicate the different groups of genes with very-high sparsity, high sparsity, moderate  
 20 sparsity, and low sparsity, respectively. (The colors represent the original and the imputed values  
 21 for red and turquoise, respectively.)

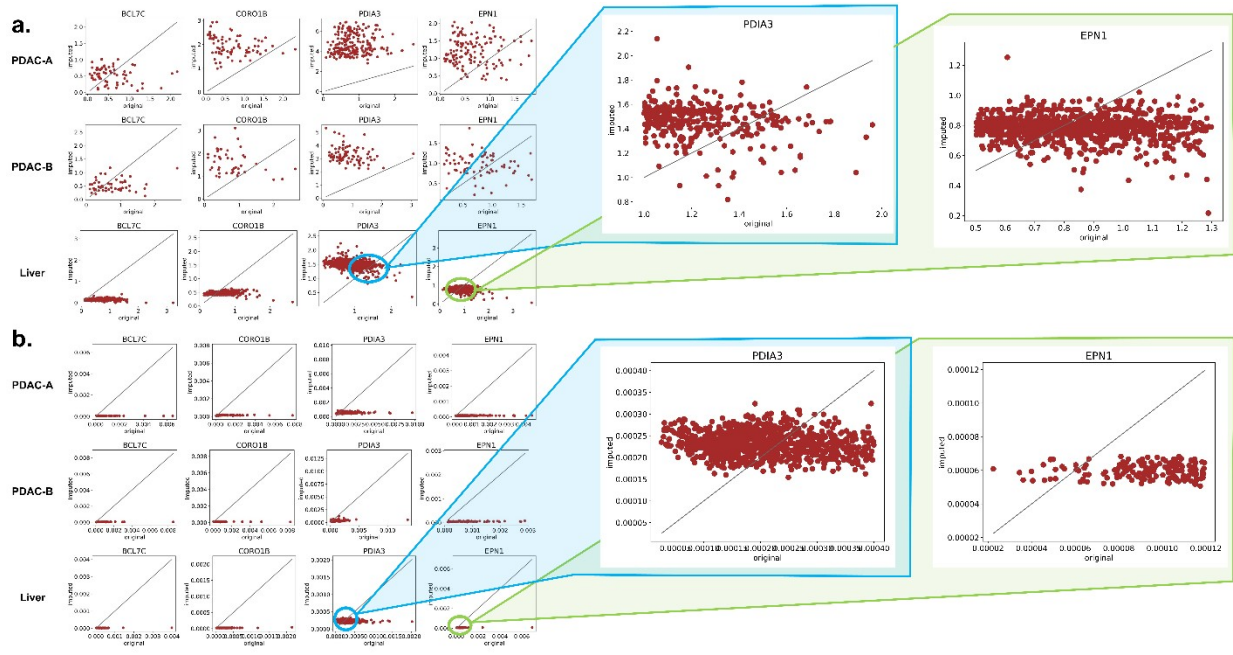

22

23 **Supplementary Figure 5:** Comparison of originally non-zero counts and the corresponding  
 24 predicted values of randomly chosen genes (OAZ1 and EIF1) in the low sparsity group with **a.**  
 25 **stPlus**, **b. gimVI** in the Liver sample. The black line represents the location where the original  
 26 value and its predicted value are equal.

a.

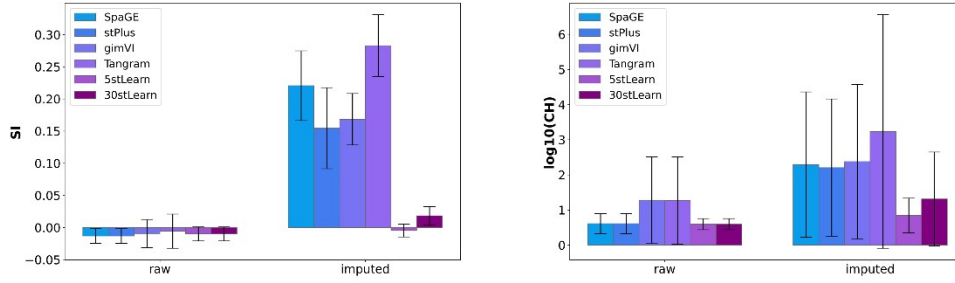

b.

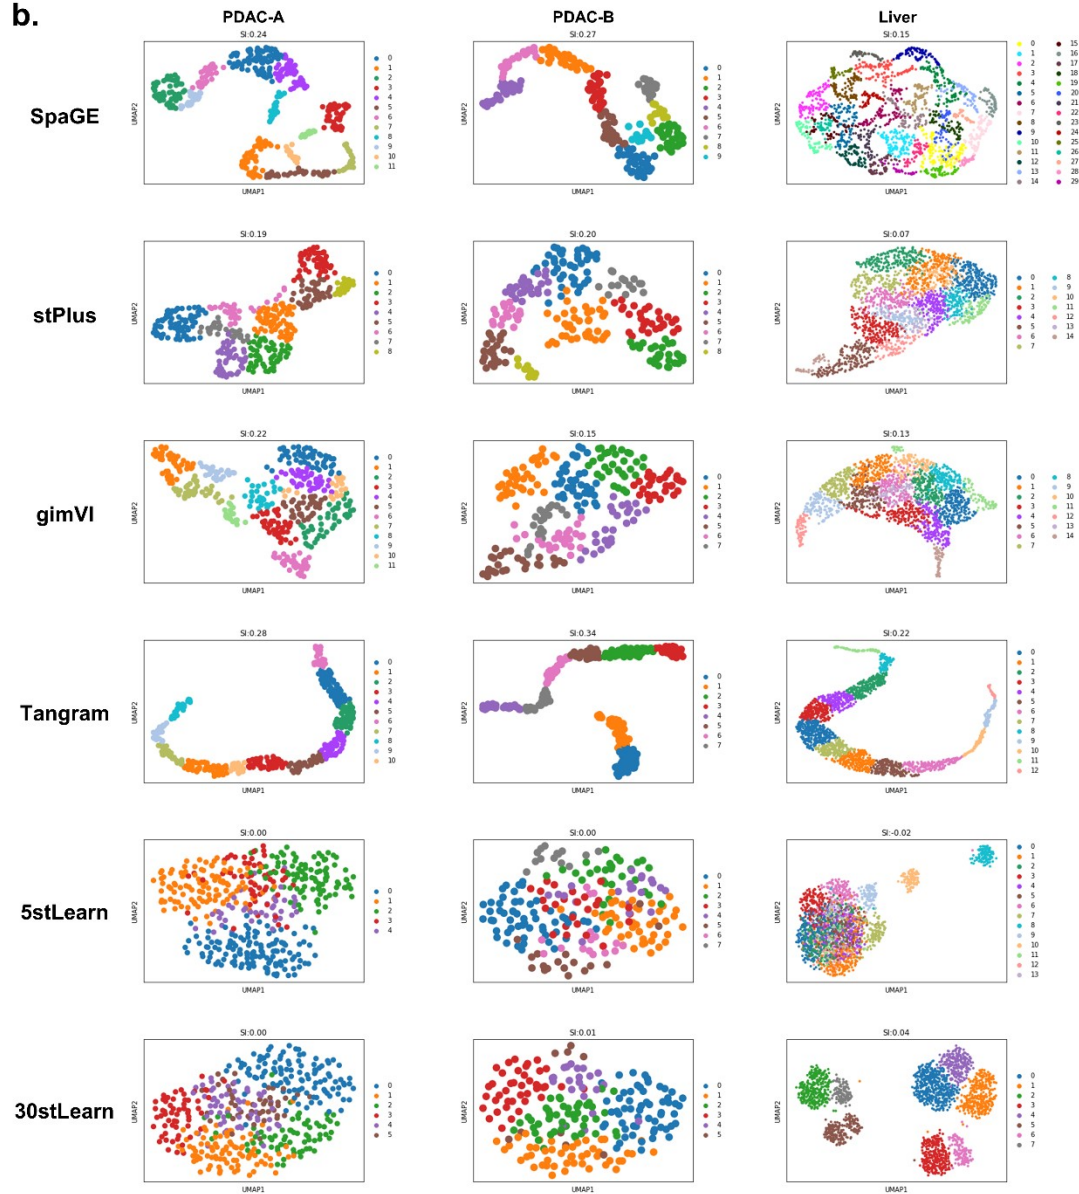

27

28 **Supplementary Figure 6:** Clustering performance evaluation with a. SI and CH, and b. projection

29 of the clusters after imputation.
